# Supplementary material for: Cholesterol depletion impairs contractile machinery in neonatal rat cardiomyocytes
Source: Springer Nature journal article supplement (doi:10.1038/srep43764), 2017-03-03
Supplement: 41598_2017_BFsrep43764_MOESM43_ESM.pdf [file 41598_2017_BFsrep43764_MOESM43_ESM.pdf]

1 SUPPLEMENTAL MATERIAL FROM:

2 **Cholesterol depletion impairs contractile machinery in neonatal rat cardiomyocytes**

3

4 Barbara Hissa<sup>1\*</sup>; Patrick W. Oakes<sup>1</sup>, Bruno Pontes<sup>2</sup>, Guillermina Ramírez-San Juan<sup>1</sup>; and  
5 Margaret L. Gardel<sup>1\*</sup>

6 <sup>1</sup> James Franck Institute, Institute for Biophysical Dynamics and Physics Department, University  
7 of Chicago, Chicago, IL, United States

8 <sup>2</sup> LPO-COPEA, Instituto de Ciências Biomédicas, Universidade Federal do Rio de Janeiro, Rio  
9 de Janeiro, RJ, Brazil

10 \* **Corresponding authors**

11

12 Supplemental figures and figure legends

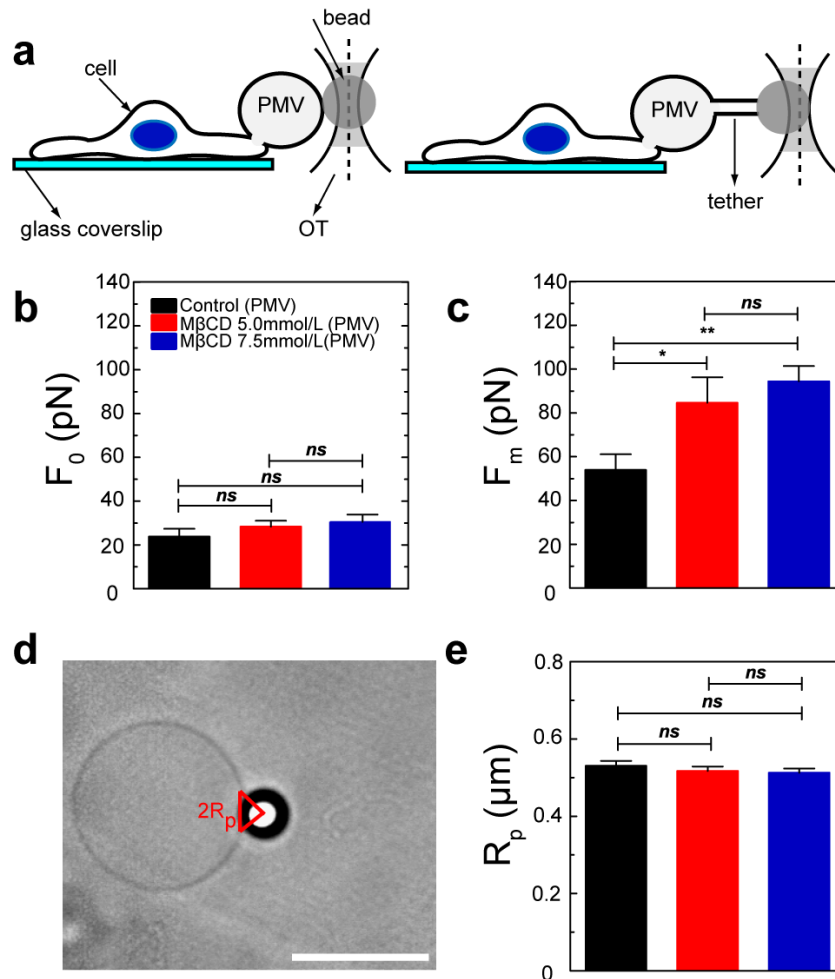

13

14 **Figure S1: Cholesterol depletion changes membrane tension but not bending rigidity of**  
15 **cardiomyocyte plasma membrane vesicles** (A) Cartoon of a cardiomyocyte and an optically-  
16 trapped polystyrene bead attached to the pre-formed plasma membrane vesicle PMV (left) and  
17 formation of the tether tube (right). (B) Mean and standard error for  $F_0$  values of control (n=15)  
18 and cholesterol depleted cardiomyocytes treated with either 5.0 (n=18) or 7.5 mmol/L MβCD  
19 (n=16). (C) Mean and standard error for  $F_m$  values of control (n=15) and cholesterol depleted  
20 cardiomyocytes treated with either 5.0 (n=18) or 7.5 mmol/L MβCD (n=16). (D) Bright field  
21 image of a real cardiomyocyte PMV showing the schematics for calculating the patch radius  
22 ( $R_p$ ). Scale bar 10 μm. (E) Mean and standard error for  $R_p$  values of control (n=15) and  
23 cholesterol depleted cardiomyocytes treated with either 5.0 (n=17) or 7.5 mmol/L MβCD (n=16).  
24 \*\*  $p < 0.05$ , ns= not statistically different according Students T test.

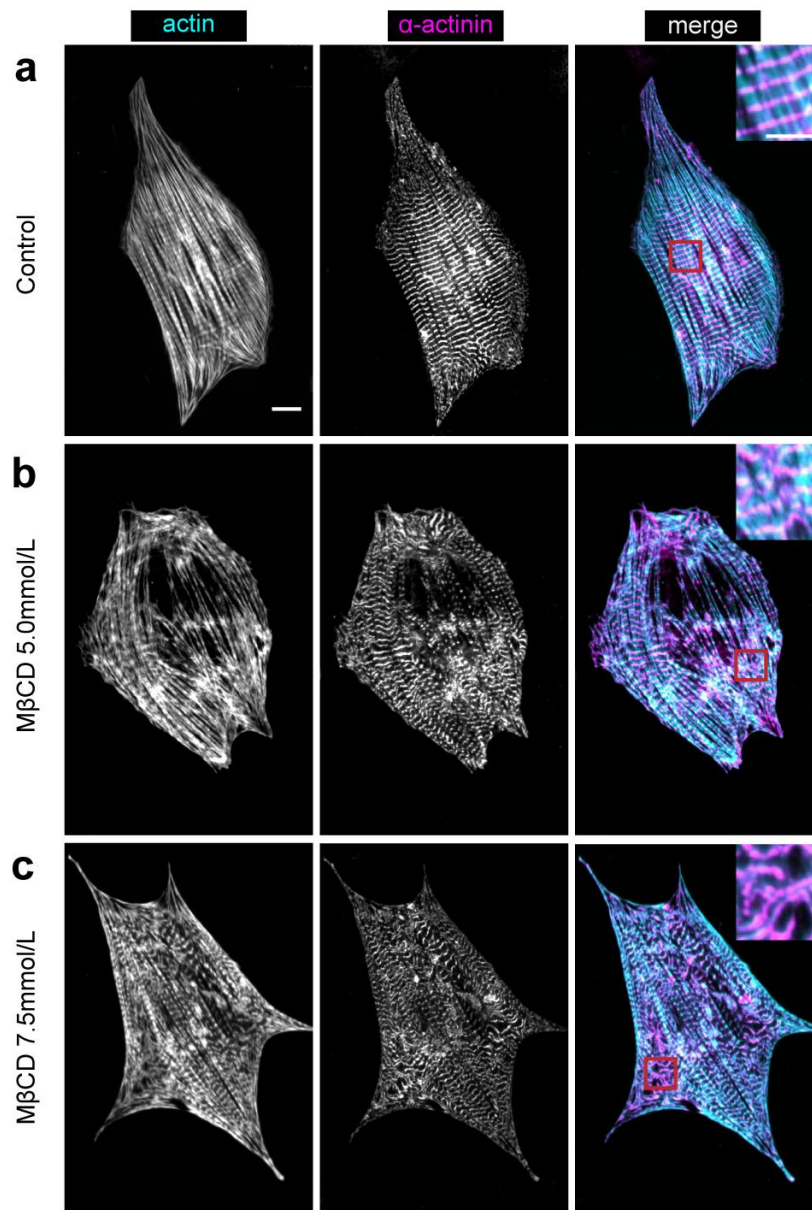

25

26 **Figure S2: Cholesterol depletion changes myofibril architecture of primary neonatal**  
 27 **cardiomyocytes.** Representative images of control (A), MβCD 5.0 mmol/L (B) and MβCD 7.5  
 28 mmol/L treated cells (C) fixed and labeled for actin (Phalloidin) (cyan) (right panel) and α-actinin  
 29 (magenta) (mid panel). Merges of the two channels are shown in the left panel. Insets show  
 30 merged images of actin and α-actinin. Scale bar 10 μm.

31

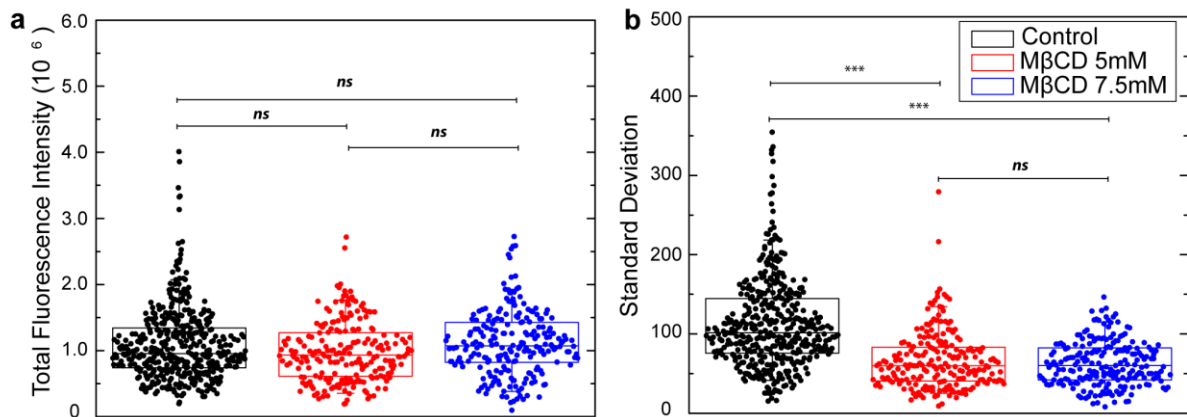

32

33

34 **Figure S3: Cholesterol depletion changes caveolin-3 distribution in neonatal**  
 35 **cardiomyocytes.** (A) Box plots showing background corrected total fluorescence intensity  
 36 measured for 5 distinct boxes/ cell distributed uniformly across cell area. At least 20 cells/  
 37 condition were analyzed. The total fluorescence is a measure of the total amount of caveolin-3  
 38 within that particular region. No statistical differences were found between analyzed groups. (B)  
 39 Standard deviation of the mean obtained for the same regions analyzed in (A). The standard  
 40 deviation informs how uniformly distributed caveolin-3 is within each analyzed region. Statistical  
 41 differences were found between control and cholesterol depleted groups. Cholesterol depleted  
 42 groups have a more uniformly distributed fluorescence pattern in comparison to control cells  
 43 and that corroborates what is depicted in Fig.4. \*\*\*  $p < 0.0001$ , ns= not statistically different  
 44 according to Student's T-test.

45

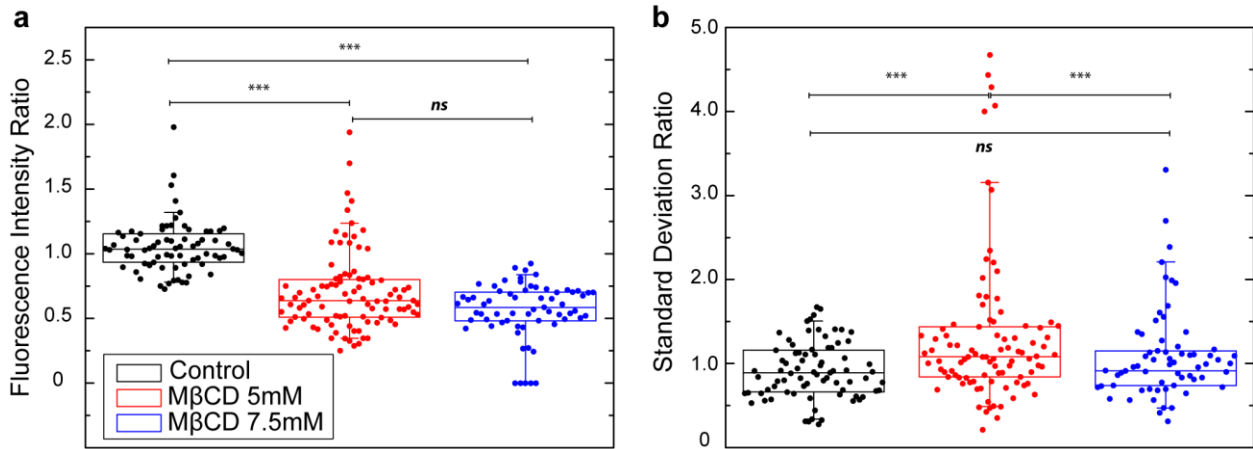

46

47

48 **Figure S4: Cholesterol depletion changes distribution of  $Ca_v1.2$  subunit of L-type  $Ca^{2+}$**   
 49 **channel.** (A) Boxplots showing the ratio between background corrected total fluorescence for 5  
 50 distinct boxes/ cell distributed around the perinuclear region and for 5 different boxes that were  
 51 placed away from the perinuclear region. At least 20 cells/ condition were analyzed. There is a  
 52 significant reduction in the fluorescence ratio when cholesterol is depleted. This result shows  
 53 that cholesterol depletion redistributes  $Ca_v1.2$  across the cell membrane away from the  
 54 perinuclear region. (B) Standard deviation of the mean obtained for the same regions analyzed  
 55 in (A). The values for standard deviation increased for 5mM MβCD and showed a tendency for  
 56 increasing for 7.5mM MβCD case. This result reveals that cholesterol depletion is changing the  
 57 distribution of  $Ca_v1.2$  across the cell and that distribution is becoming less uniform. \*\*\*  
 58  $p < 0.0001$ , ns= not statistically different according to Student's T-test.

59

60 Supplemental tables:

61

62 Table S1: Summary of values obtained for cardiomyocytes PMVs

| Condition                                     | $F_0$ (pN) | $F_m$ (pN)  | $R_p$ ( $\mu\text{m}$ ) | $R$ ( $\mu\text{m}$ ) | $\sigma$<br>( $\text{pN}\cdot\mu\text{m}^{-1}$ ) | $\kappa$<br>( $\text{pN}\cdot\mu\text{m}$ ) |
|-----------------------------------------------|------------|-------------|-------------------------|-----------------------|--------------------------------------------------|---------------------------------------------|
| <b>Control (PMV)</b>                          | $24 \pm 4$ | $54 \pm 7$  | $0.53 \pm 0.01$         | $0.21 \pm 0.07$       | $9.0 \pm 3$                                      | $0.8 \pm 0.3$                               |
| <b>M<math>\beta</math>CD 5.0 mmol/L (PMV)</b> | $28 \pm 3$ | $85 \pm 12$ | $0.52 \pm 0.01$         | $0.13 \pm 0.03$       | $18 \pm 5$                                       | $0.6 \pm 0.2$                               |
| <b>M<math>\beta</math>CD 7.5 mmol/L (PMV)</b> | $30 \pm 3$ | $94 \pm 7$  | $0.51 \pm 0.01$         | $0.12 \pm 0.02$       | $20 \pm 4$                                       | $0.6 \pm 0.1$                               |

63

64

65 Detailed methods

66

67 *Primary culture of neonatal rat cardiomyocytes*

68 Ten to fifteen rat pups, Wistar strain, were euthanized and had their hearts removed aseptically,  
69 immediately transferred to an ice-cold Hank's Balanced Salt Solution (Sigma-Aldrich, St. Louis,  
70 MO) (pH 7.4) and kept on ice until the mechanical dissociation step. Next, the hearts were  
71 rinsed in fresh cold HBSS, minced into 1 mm<sup>3</sup> fragments and partially digested in an enzymatic  
72 solution containing HBSS and 1% (vol/vol) Trypsin-EDTA 0.25% (Corning, New York, NY)  
73 overnight, at 4°C, under gentle agitation. The following day, 1 mL of soybean trypsin inhibitor  
74 (Sigma-Aldrich; 1 mg/mL in HBSS) was added to the solution. Type-II Collagenase  
75 (Worthington, Lakewood NJ; 1mg/mL), was also added to the semi-digested hearts and  
76 incubated with the cardiac tissue for approximately 40 minutes, at 37°C under constant rocking.  
77 Tissue clumps were mechanically dissociated with a plastic sterile pipette and the resultant cell  
78 solution was filtered through a 70 µm cell strainer (BD Bioscience, San Jose, CA) and  
79 centrifuged at 300 g for 5 minutes. The cell pellet was resuspended in high-glucose DMEM  
80 (Corning), supplemented with 10% (vol/vol) fetal bovine serum (FBS) and 1% (vol/vol)  
81 penicillin/streptomycin (100 U/mL/100 µg/mL; Corning). The cell suspension was pre-plated for  
82 2 hours at 37°C in a 5% CO<sub>2</sub> incubator in order to remove non-muscle cells. Purified  
83 cardiomyocytes were collected, seeded at a density of 4.0x10<sup>5</sup> cells/well onto 6-well plates  
84 containing round coverslips coated with fibronectin alone or containing fibronectin crosslinked to  
85 polyacrylamide (PAA) gels for traction force microscopy experiments. Cells were kept at 37°C in  
86 a humidified incubator, 5% CO<sub>2</sub>, for 72 hours before experimental procedures. New cultures  
87 were prepared for each experiment.

88

89 *Drug treatments*

90 In order to deplete cholesterol from the cardiomyocytes plasma membranes, the cells were  
91 rinsed 3x with PBS containing calcium and magnesium (PBS +/-; Corning) and incubated with  
92 either 5.0 or 7.5 mM methyl-beta cyclodextrin (MβCD; Sigma-Aldrich), dissolved in serum free  
93 DMEM, for 45 minutes, at 37°C. After the incubation period, cells were rinsed again 3x with PBS  
94 +/- and fresh serum free media was added.

95

96 *Immunofluorescence*

97

98 Following treatment, the cardiomyocytes were rinsed in warm cytoskeleton buffer (CB buffer; 10  
99 mM MES, 3 mM MgCl<sub>2</sub>, 1.38 M KCl, and 20 mM EGTA) and then fixed and permeabilized in 4%  
100 PFA (Electron Microscopy Sciences, Hatfield, PA), 1.5% bovine serum albumin (BSA; Thermo  
101 Fisher Scientific, Waltham, MA), and 0.5% Triton X-100 (Sigma- Aldrich) in CB buffer for 10 min  
102 at 37°C. Coverslips were then rinsed three times in PBS and blocked in CB buffer plus 1.5%  
103 BSA and 0.5% Triton X-100 for 30 minutes at room temperature. The primary antibodies used in  
104 this work were the following: mouse monoclonal anti-sarcomeric α-actinin (1:200; Sigma-  
105 Aldrich), rabbit polyclonal anti-caveolin 3 (1:200; Thermo-Scientific), mouse monoclonal alpha 2  
106 subunit L-type Ca<sup>2+</sup> channel (1:250; Abcam, Cambridge, MA) The primary antibodies were  
107 diluted in the same buffer used for the blocking step and the cells were incubated at room  
108 temperature for 1h. Next, the coverslips were rinsed 3x with PBS and incubated with secondary  
109 antibodies AlexaFluor 647 donkey anti-mouse (1:300; Invitrogen, Thermo Fisher Scientific,  
110 Waltham, MA) and AlexaFluor 568 goat anti-rabbit (1:300; Invitrogen). The actin cytoskeleton  
111 was labeled using Phalloidin conjugated with AlexaFluor 488 (1:400; Invitrogen). Coverslips  
112 were rinsed again in PBS and mounted on glass slides using the SlowFade Antifade kit  
113 (Invitrogen). Images of cells were taken on Ti-E Nikon inverted microscope (Nikon, Melville, NY)  
114 with a confocal scan head (CSU-X; Yokogawa Electric, Musashino, Tokyo, Japan), laser merge  
115 module containing 491, 561, and 642 laser lines (Spectral Applied Research, Richmond Hill,  
116 Ontario, Canada), and an HQ2 CCD camera (Roper Scientific, Trenton, NJ). Metamorph  
117 acquisition software (Molecular Devices, Eugene, OR) was used to control the microscope  
118 hardware. Images were acquired using either 60x 1.49 NA ApoTIRF or 40x 1.30 Plan Fluor oil-  
119 immersion objectives.

120

121 *Traction Force Microscopy*

122 For Traction Force Microscopy (TFM) experiments, cardiomyocytes were isolated and plated on  
123 polyacrylamide (PAA) substrates as previously described in Oakes *et al.*<sup>1</sup> and Aratyn-Schaus *et*

124 *al.*<sup>2</sup>. Briefly, gels were polymerized from mixtures of acrylamide/bis-acrylamide solutions to yield  
 125 8.64 KPa shear modulus gels. Gels were polymerized on top of silanized glass coverslips and  
 126 contained far-red 40 nm fluorescent beads (Invitrogen) embedded to serve as deformation  
 127 markers. Fibronectin (Millipore, Billerica, MA) was covalently crosslinked to the gel surface  
 128 using hydrazine hydrate (Sigma-Aldrich)<sup>3</sup>. Methods for traction force reconstruction have been  
 129 previously described in the literature<sup>1,2,4-6</sup>. Briefly, the fluorescent beads in the gel were imaged  
 130 at a frame rate of 2.5 images/second. Following the experiment, cells were detached from the  
 131 substrate using 0.5% sodium dodecyl sulfate and a reference image of the embedded  
 132 fluorescent beads was also taken. Images were aligned to correct for drift, and compared with  
 133 the reference image using particle imaging velocimetry software (<http://www.oceanwave.jp/software/mpiv/>) in MATLAB to produce a displacement field with a grid spacing  
 134 of 1.43  $\mu\text{m}$ <sup>6</sup>. Displacement vectors were filtered and interpolated using the Kriging interpolation  
 135 method. Traction stresses were reconstructed from the displacement field via Fourier Transform  
 136 Traction Cytometry<sup>4,7</sup>, using zeroth-order regularization. The same regularization parameters  
 137 were used for all datasets. Strain energy per cell area was also calculated.

139

#### 140 *Tether extraction from cardiomyocytes*

141 Cardiomyocytes from control and cholesterol depleted samples were submitted to tether  
 142 extraction using an infrared optical tweezers (OT) setup. For this assay, polystyrene beads  
 143 (radius  $1.52 \pm 0.02 \mu\text{m}$ , Polysciences, Warrington) were added to the culture dish containing the  
 144 cardiomyocytes and the dish was placed on the microscope. The OT captured a single  
 145 polystyrene bead and was used to press that bead against the surface of a chosen  
 146 cardiomyocyte for 5 seconds to allow bead attachment. After bead attachment, the automated  
 147 microscope stage (Prior Scientific, Rockland, MA) was moved with a controlled and constant  
 148 speed (1  $\mu\text{m/s}$ ). Movies were taken during the tether extraction experiment using a CCD  
 149 Hamamatsu C2400 camera (Hamamatsu, Japan) coupled with a SCION FG7 frame grabber  
 150 (Scion Corporation, Torrance, CA) at a 10 frames/second capture rate. The OT setup and force  
 151 calibration were performed as previously described<sup>8,9</sup>. In order to calculate the bending  
 152 modulus  $\kappa$  and membrane tension  $\sigma$  we also measured the tethers radii by using Scanning  
 153 Electron Microscopy (SEM) according to previously published work<sup>8-10</sup>.

154

#### 155 *Tether extraction from plasma membrane vesicles*

156 In order to separate the contribution from both plasma membrane and cytoskeleton to cortical  
 157 mechanical properties we decided to make plasma membrane vesicles (PMVs) as previously  
 158 reported<sup>9,11</sup>. Briefly, after incubating the cardiomyocytes with M $\beta$ CD, we rinsed the cells and  
 159 exposed them to PMV solution (25mM formaldehyde, 20mM DTT, 2mM CaCl<sub>2</sub>, 10mM HEPES,  
 160 0.15M NaCl, pH 7.4). Cells were kept in this solution for 30 minutes in order to make PMVs.  
 161 After incubation, cells were rinsed carefully and fresh serum free DMEM was added before the  
 162 samples were submitted to tether extraction using the same setup as described above.

163

#### 164 *Imaging of calcium sparks*

165 For imaging Ca<sup>2+</sup> in the cardiomyocytes, cells were incubated with Fluo-4 AM (Invitrogen)  
 166 diluted in DMSO at 5  $\mu\text{M}$  final concentration in Tyrode Buffer (NaCl 132 mM, KCl 4 mM, 1.8 mM  
 167 CaCl<sub>2</sub>·2H<sub>2</sub>O, 1.2 mM MgCl<sub>2</sub>·6H<sub>2</sub>O, 10 mM Hepes, 5.5mM glucose, pH 7.4) for 30 minutes. After  
 168 the incubation period, cells were rinsed 3x with Tyrode and kept in this buffer during experiment.  
 169 To capture Fluo-4 AM signal we performed live cell imaging using 20x 0.75 NA Plan Fluo Multi-  
 170 immersion objective on a Nikon Ti-E microscope with a Lumen 200 Pro Light source (Prior  
 171 Scientific, Cambridge UK) and an H2Q cooled CCD camera controlled via Metamorph  
 172 acquisition software at 5 images/second frame rate. In order to evaluate calcium sparks,  
 173 cytoplasmic fluorescence signal values were obtained using ImageJ (National Institutes of  
 174 Health, Bethesda MD). In order to convert fluorescence values into Ca<sup>2+</sup> concentration we used  
 175 the following equation<sup>12</sup>:

$$[Ca^{2+}] = \frac{KR}{\frac{K}{[Ca^{2+}]_{rest} + 1} - R}$$

176 Where K is the dissociation constant of the Ca<sup>2+</sup> dye used (for Fluo-4 AM is 345 nM, see  
 177 Invitrogen Inc.), R is the fluorescence ratio  $\frac{F'}{F'_0}$  ( $F'_0$  is the minimum fluorescence recorder for a

178 specific cell analysed),  $[Ca^{2+}]_{rest}$  for a neonatal ventricular rat cardiomyocyte is approximately  
179 140 nM<sup>13</sup>.

180

#### 181 *Measurement of Protein Kinase A (PKA) enzymatic activity*

182 To measure cAMP- mediated PKA activity, cell extracts obtained from control and cholesterol  
183 depleted cardiomyocytes were submitted to enzymatic assay using PKA activity kit (Enzo Life  
184 Sciences, Farmingdale, NY). Handling of cell extracts and preparation of the assay were  
185 performed according to the manufacturer's instructions.

186

#### 187 *Quantification of $\alpha$ -actinin bands alignment*

188 Spacing of  $\alpha$ -actinin bands was measured using a custom written MATLAB script. First a  
189 linescan averaged across 5 pixels was drawn along an actin stress fiber, and the center of each  
190  $\alpha$ -actinin band was determined by the position of the local maximum. The spacing between  
191 bands was measured as the distance between local maxima. The orientation of each band was  
192 determined by calculating the axis of the least second moment for a small window (11x11  
193 pixels) centered at each band. Average z-band images were created by taking the average of  
194 these windows. The average difference in angle was determined by comparing the angle  
195 difference between neighboring z-bands. Measurements of both z-line spacing and angle were  
196 performed in at least three different myofibrils within each cell in order to take into account  
197 intrinsic variations in the myofibrils that naturally occur. At least 90 myofibrils were analyzed per  
198 condition, reflecting 30 different cells from 3 independent experiments. In order to minimize the  
199 variations in shape while characterizing myofibril architecture, we chose to analyze myofibrils  
200 that were straight for at least 10  $\mu$ m and away from the cell boundary.

201

#### 202 *Quantification of calpain activity*

203 Control and cholesterol depleted cardiomyocytes were harvested and cell extracts were  
204 submitted to calpain enzymatic activity using Calpain Activity Fluorometric Assay Kit (BioVision  
205 Inc., Milpitas, CA). Cell extract handling and enzymatic activity were performed according to  
206 manufacturer's instructions.

207

#### 208 *Fourier analysis of contraction and calcium waves*

209 Frequency analysis of calcium and contraction signals was performed in MATLAB. The signal  
210 was first baseline subtracted and the power spectrum was obtained by taking the 1D Fast  
211 Fourier Transform and squaring the result. The peak frequency was identified as the local  
212 maximum with the strongest signal in the power spectrum.

213

#### 214 *Fluorescence quantification*

215 For measuring differences in caveolin-3 distribution between control and cholesterol depleted  
216 groups, we measured background corrected total fluorescence intensity for 5 distinct boxes per  
217 cell distributed uniformly across the cell area. At least 20 cells/ condition were analyzed. The  
218 total fluorescence is a measure of the total amount of caveolin-3 within that particular region. In  
219 order to measure how homogeneous the caveolin-3 distribution gets after cholesterol depletion  
220 we calculated the standard deviation of the mean for the same regions described previously.  
221 The lower the standard deviation values the less heterogeneous the protein distribution  
222 becomes. For measuring differences in distribution of the  $Ca_v1.2$  subunit of LTCC between  
223 perinuclear regions and the rest of the cell, upon cholesterol depletion, we calculated the ratio  
224 between background corrected total fluorescence intensity measured for 5 distinct boxes near  
225 the perinuclear region and for 5 other boxes away from the perinuclear region. The ratio values  
226 decrease if  $Ca_v1.2$  gets redistributed away from the perinuclear region. In order to measure how  
227 heterogeneous the protein distribution gets after cholesterol depletion we also measured the  
228 ratio standard deviation. The higher the standard deviation the higher is the discrepancy  
229 between  $Ca_v1.2$  distribution between perinuclear and away from the perinuclear regions.

#### 230 *Statistical analysis*



231 We performed Student's t-test comparing control and cholesterol depleted groups. Data was  
232 represented by mean values  $\pm$  standard errors unless otherwise stated. Statistical differences  
233 were labeled with asterisks.

234

236

- 237 1 Oakes, P. W., Beckham, Y., Stricker, J. & Gardel, M. L. Tension is required but not sufficient for  
238 focal adhesion maturation without a stress fiber template. *Journal of Cell Biology* **196**, 363-374,  
239 doi:10.1083/jcb.201107042 (2012).
- 240 2 Aratyn-Schaus, Y., Oakes, P. W., Stricker, J., Winter, S. P. & Gardel, M. L. Preparation of  
241 compliant matrices for quantifying cellular contraction. *Journal of visualized experiments : JoVE*,  
242 doi:10.3791/2173 (2010).
- 243 3 Maruthamuthu, V. & Gardel, M. L. Protrusive Activity Guides Changes in Cell-Cell Tension during  
244 Epithelial Cell Scattering. *Biophysical Journal* **107**, 555-563, doi:10.1016/j.bpj.2014.06.028  
245 (2014).
- 246 4 Sabass, B., Gardel, M. L., Waterman, C. M. & Schwarz, U. S. High resolution traction force  
247 microscopy based on experimental and computational advances. *Biophysical Journal* **94**, 207-  
248 220, doi:10.1529/biophysj.107.113670 (2008).
- 249 5 Plotnikov, S. V., Sabass, B., Schwarz, U. S. & Waterman, C. M. High-Resolution Traction Force  
250 Microscopy. *Quantitative Imaging in Cell Biology* **123**, 367-394, doi:10.1016/b978-0-12-420138-  
251 5.00020-3 (2014).
- 252 6 Oakes, P. W., Banerjee, S., Marchetti, M. C. & Gardel, M. L. Geometry Regulates Traction  
253 Stresses in Adherent Cells. *Biophysical Journal* **107**, 825-833, doi:10.1016/j.bpj.2014.06.045  
254 (2014).
- 255 7 Butler, J. P., Tolic-Norrelykke, I. M., Fabry, B. & Fredberg, J. J. Traction fields, moments, and  
256 strain energy that cells exert on their surroundings. *American Journal of Physiology-Cell  
257 Physiology* **282**, C595-C605 (2002).
- 258 8 Pontes, B. *et al.* Cell cytoskeleton and tether extraction. *Biophysical journal* **101**, 43-52,  
259 doi:10.1016/j.bpj.2011.05.044 (2011).
- 260 9 Pontes, B. *et al.* Membrane Elastic Properties and Cell Function. *Plos One* **8**,  
261 doi:10.1371/journal.pone.0067708 (2013).
- 262 10 Hissa, B. *et al.* Membrane cholesterol removal changes mechanical properties of cells and  
263 induces secretion of a specific pool of lysosomes. *PloS one* **8**, e82988-e82988 (2013).
- 264 11 Bauer, B., Davidson, M. & Orwar, O. Direct reconstitution of plasma membrane lipids and  
265 proteins in nanotube-vesicle networks. *Langmuir* **22**, 9329-9332, doi:10.1021/la060828k (2006).
- 266 12 Guatimosim, S., Guatimosim, C. & Song, L.-S. Imaging Calcium Sparks in Cardiac Myocytes. *Light  
267 Microscopy: Methods and Protocols* **689**, 205-214, doi:10.1007/978-1-60761-950-5\_12 (2011).
- 268 13 Gomez, J. P., Potreau, D. & Raymond, G. Intracellular calcium transients from newborn rat  
269 cardiomyocytes in primary culture. *Cell Calcium* **15**, 265-275, doi:10.1016/0143-4160(94)90066-  
270 3 (1994).

271
